# Supplementary material for: A Highly Active and Reusable Multicomponent high Entropy Metal Oxide Catalyst for Nitroarenes Hydrogenation
Source: Springer Nature journal article supplement (doi:10.1007/s11244-023-01846-z), 2023-07-17
Supplement: MOESM1 [file 25828342]

**SUPPORTING INFORMATION**

**FOR**

**A Hghly Active and Reusable Multicomponent High Entropy Metal Oxide Ctalyst for Nitroarenes Hydrogenation**

Nayereh Soltani1, Jamil Ur Rahman1, Patricia Almeida Carvalho2, and Terje Finstad1,*

1Department of Physics, Centre for Materials Science and Nanotechnology, University of Oslo, 0371 Oslo, Norway

2SINTEF Materials and Chemistry, 0373 Oslo, Norway

*Corresponding author: [terje.finstad@fys.uio.no](mailto:terje.finstad@fys.uio.no)


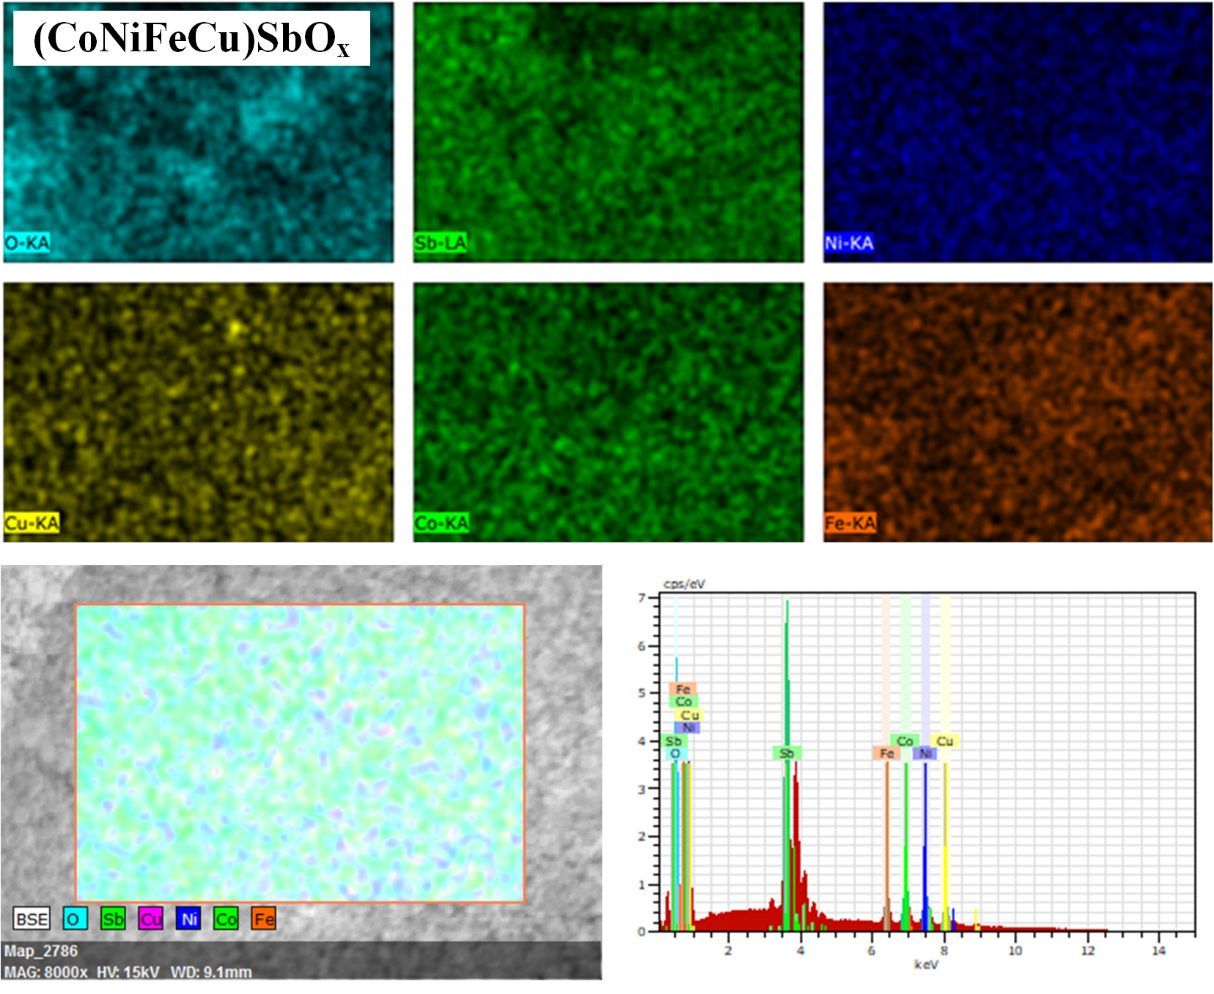


Fig. 1S. SEM image and EDX maps of (FeNiCoCu)SbOx with corresponding EDX spectrum.


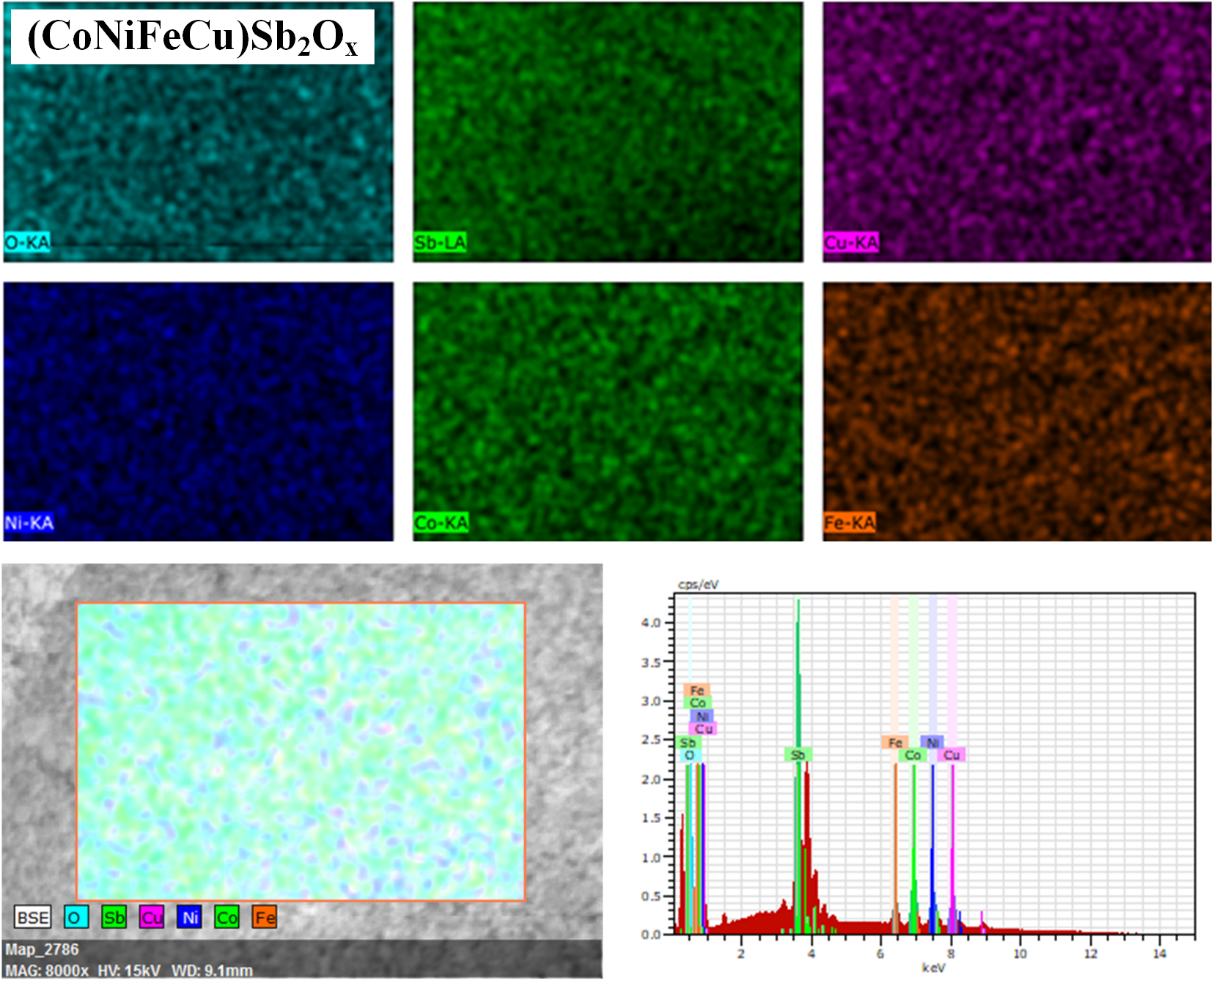


Fig. 2S. SEM image and EDX maps of (FeNiCoCu)Sb2Ox with corresponding EDX spectrum.


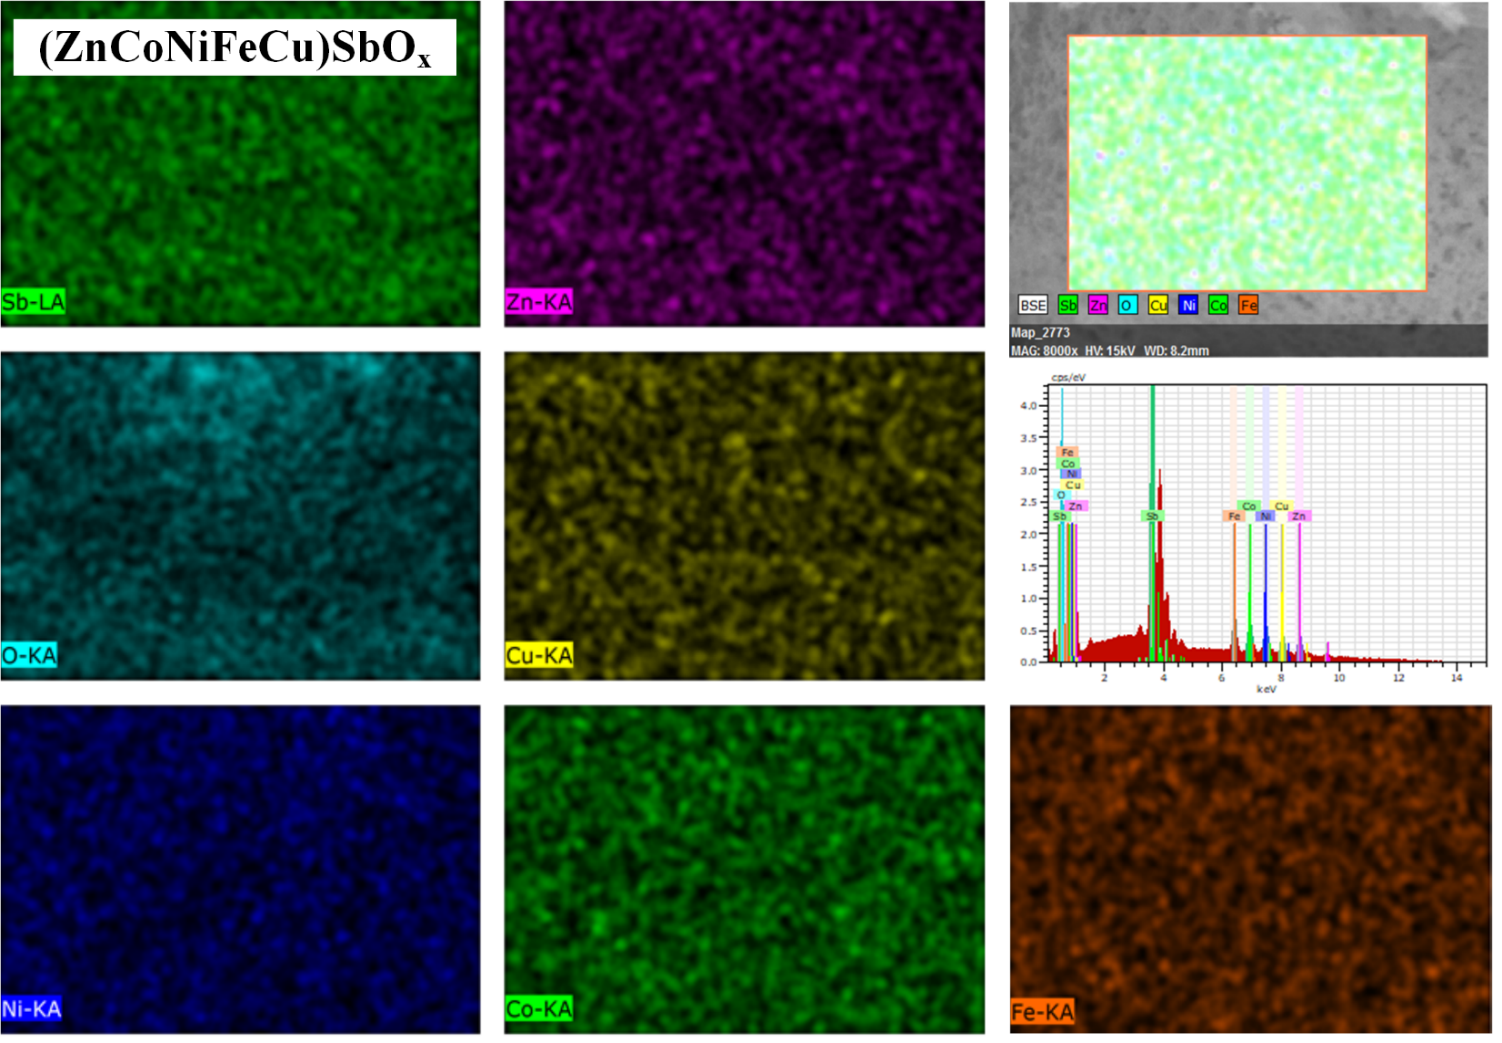


Fig. 3S. SEM image and EDX maps of (FeNiCoCuZn)SbOx with corresponding EDX spectrum.


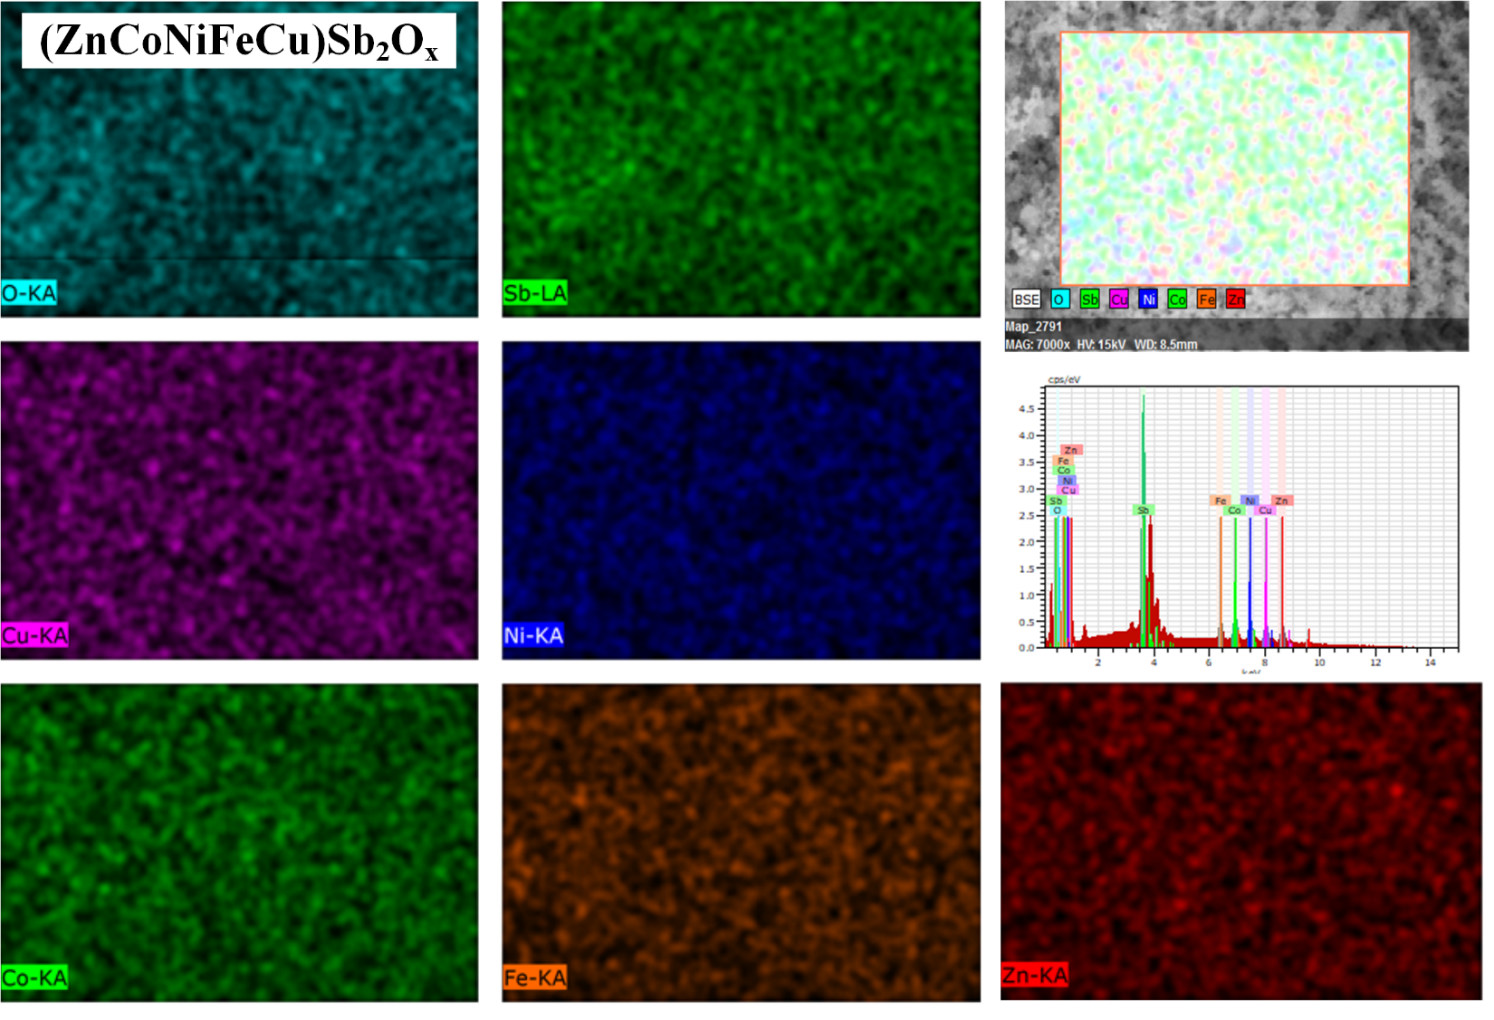


Fig. 4S. SEM image and EDX maps of (FeNiCoCuZn)Sb2Ox with corresponding EDX spectrum.


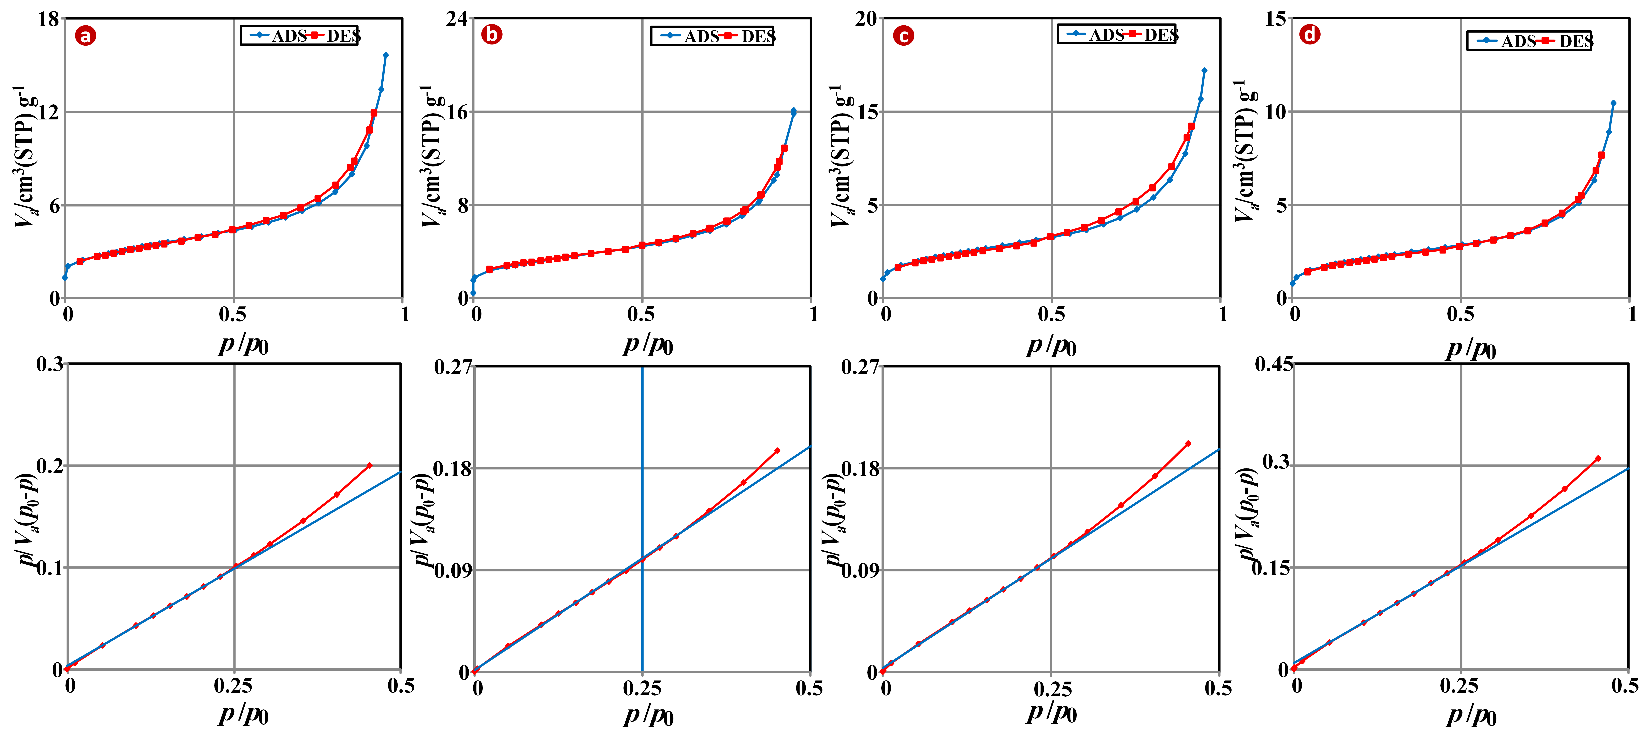


Fig. 5S. N2 adsorption–desorption isotherms and BET plots for (a) (FeNiCoCu)SbOx (b) (FeNiCoCu)Sb2Ox (c) (FeNiCoCuZn)SbOx and (d) (FeNiCoCuZn)Sb2Ox


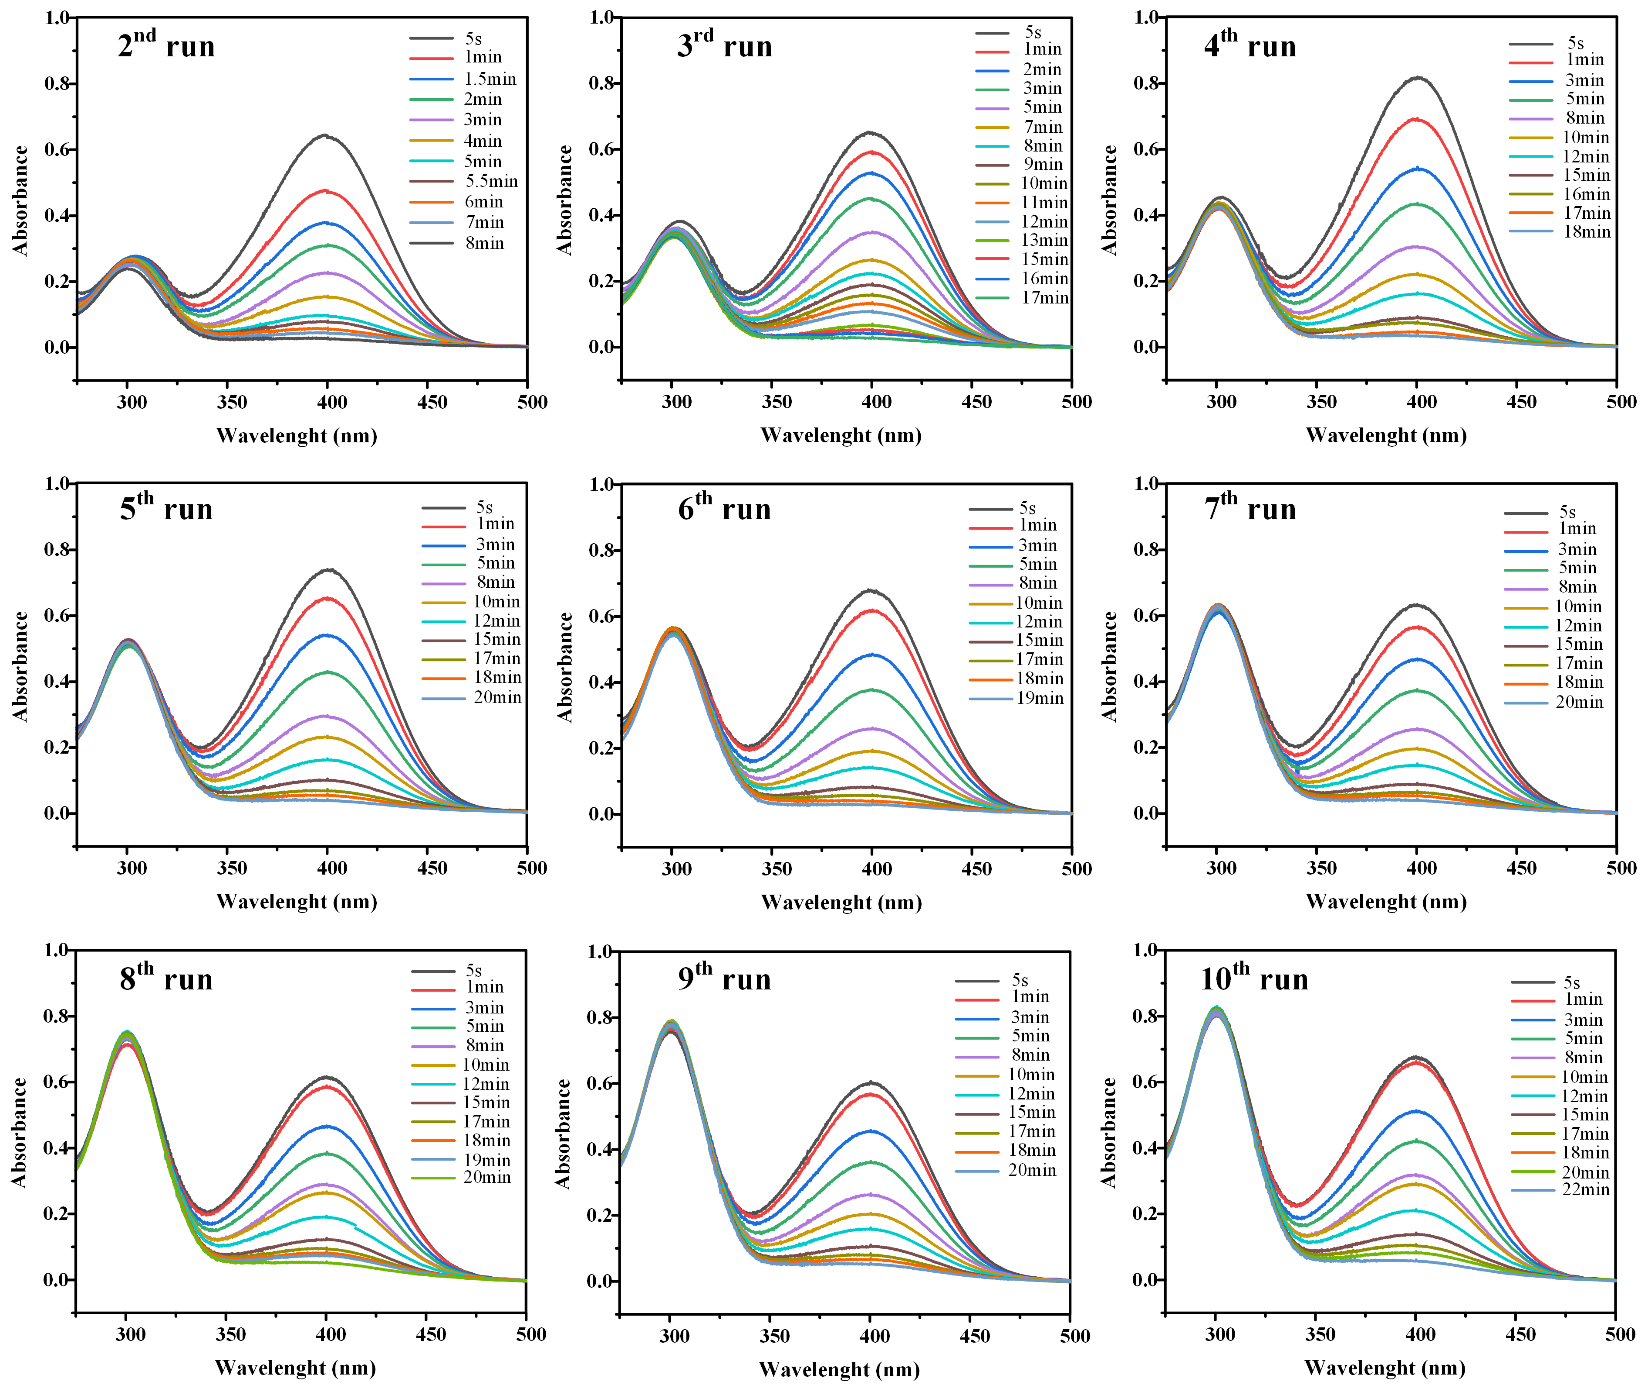


Fig. 6S. Time-dependent concentration changes of 4-NP and 4-AP in recycling activity of (FeNiCoCu)Sb2Ox


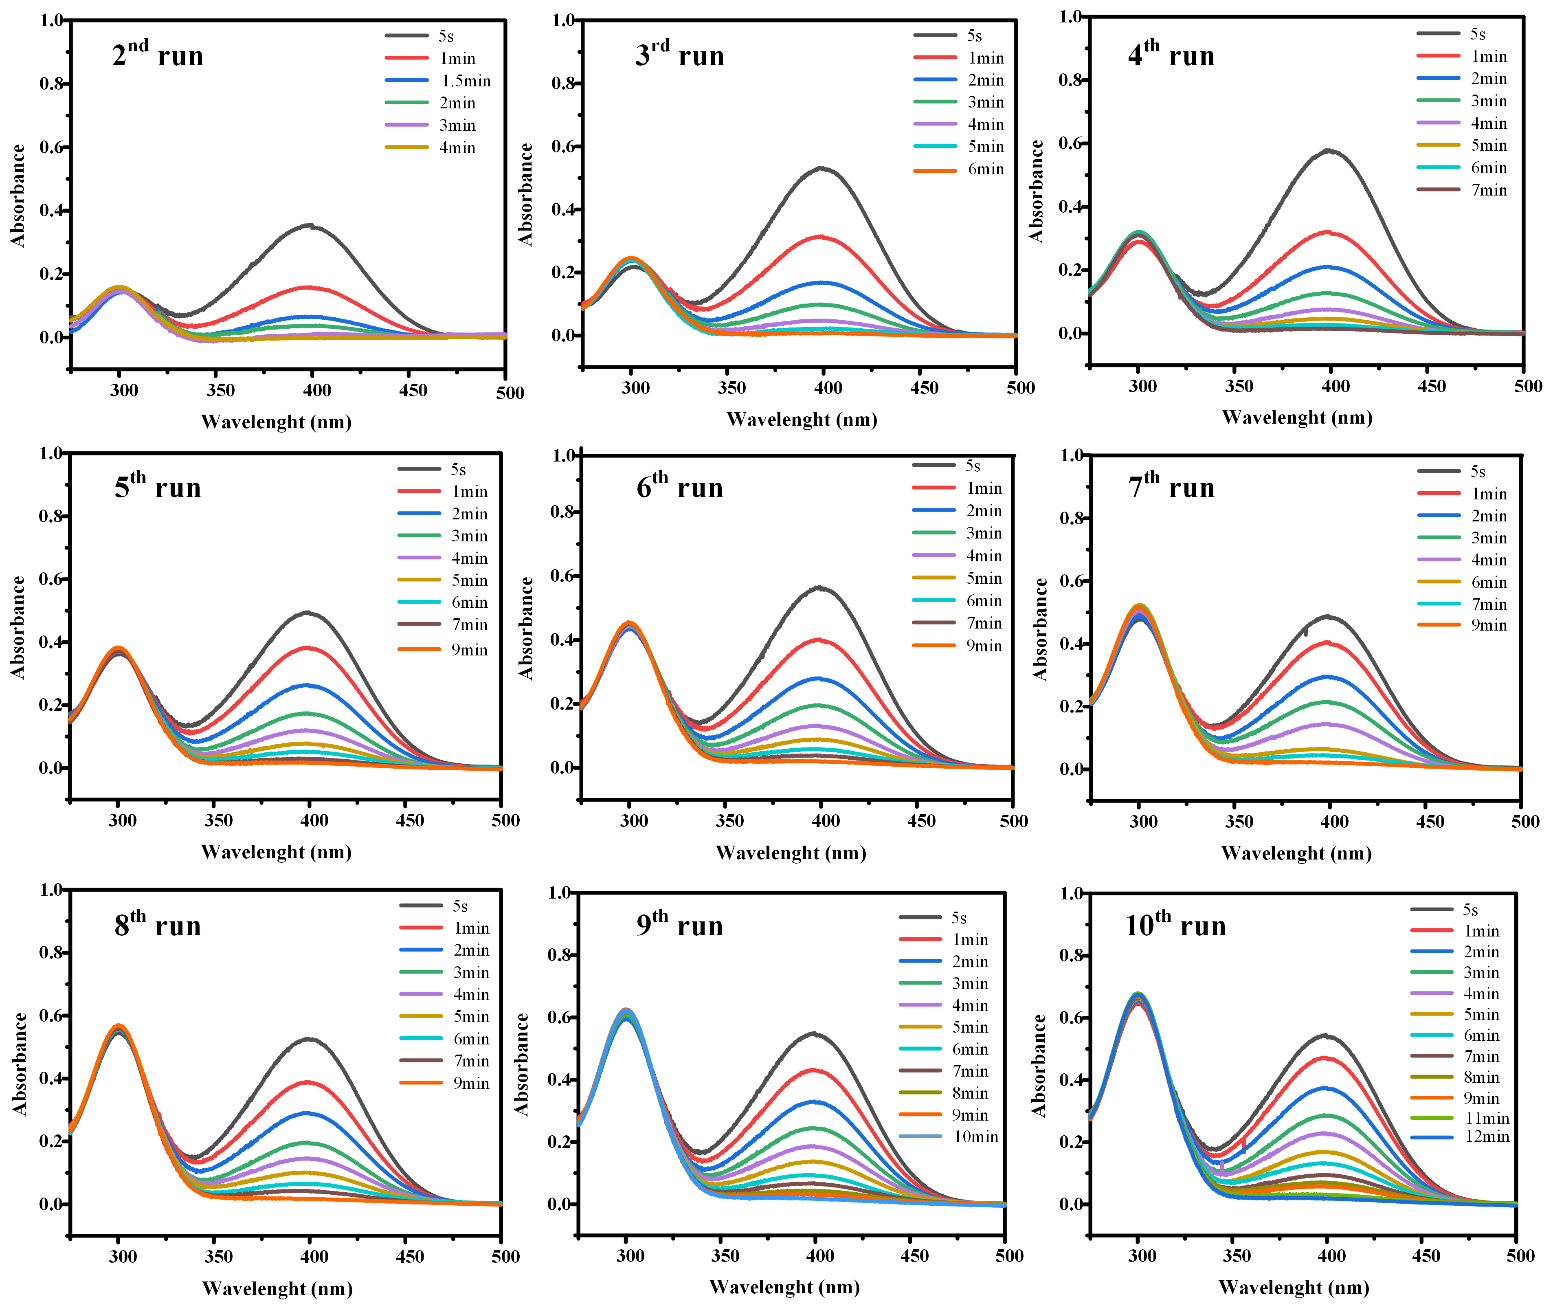


Fig. 7S. Time-dependent concentration changes of 4-NP and 4-AP in recycling activity of (FeNiCoCuZn)SbOx


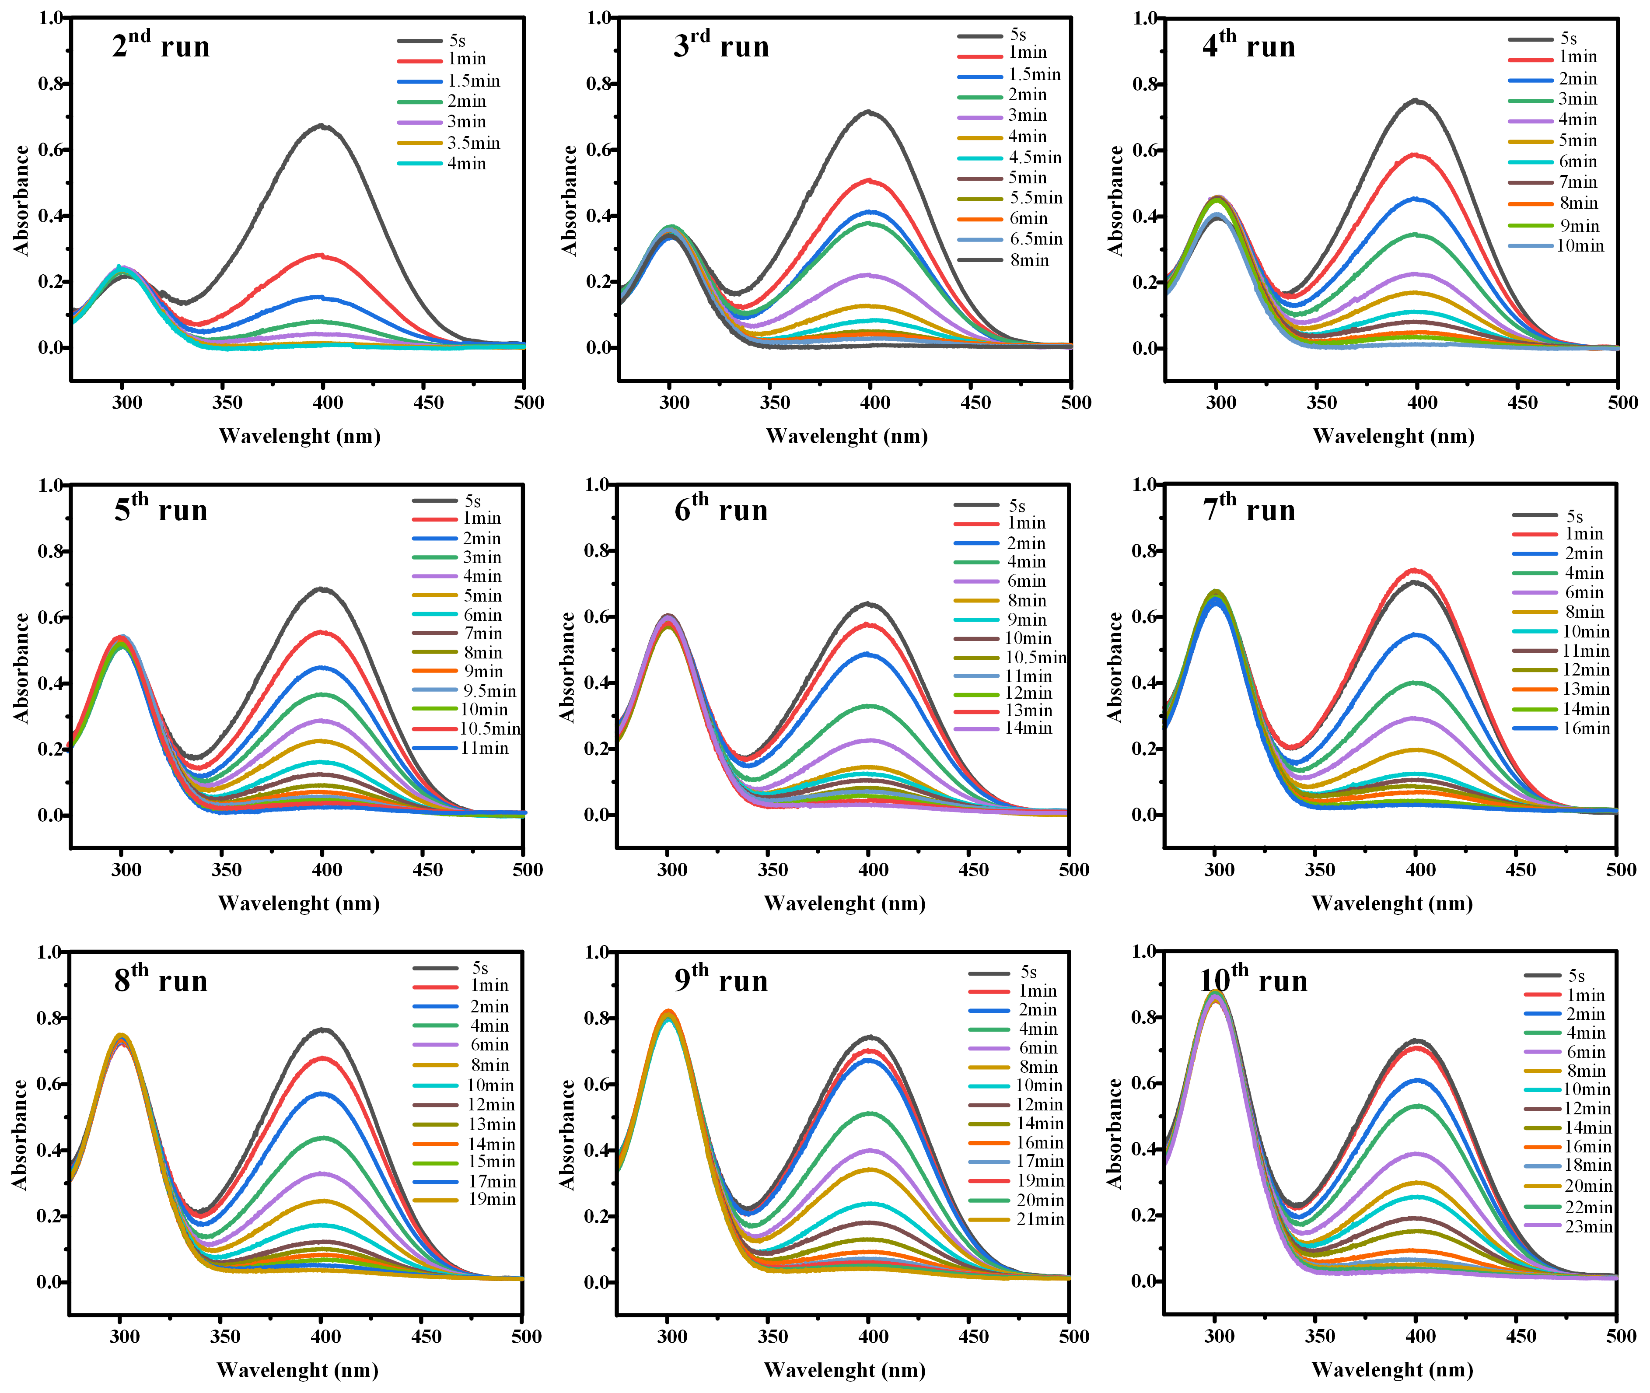


Fig. 8S. Time-dependent concentration changes of 4-NP and 4-AP in recycling activity of (FeNiCoCuZn)Sb2Ox


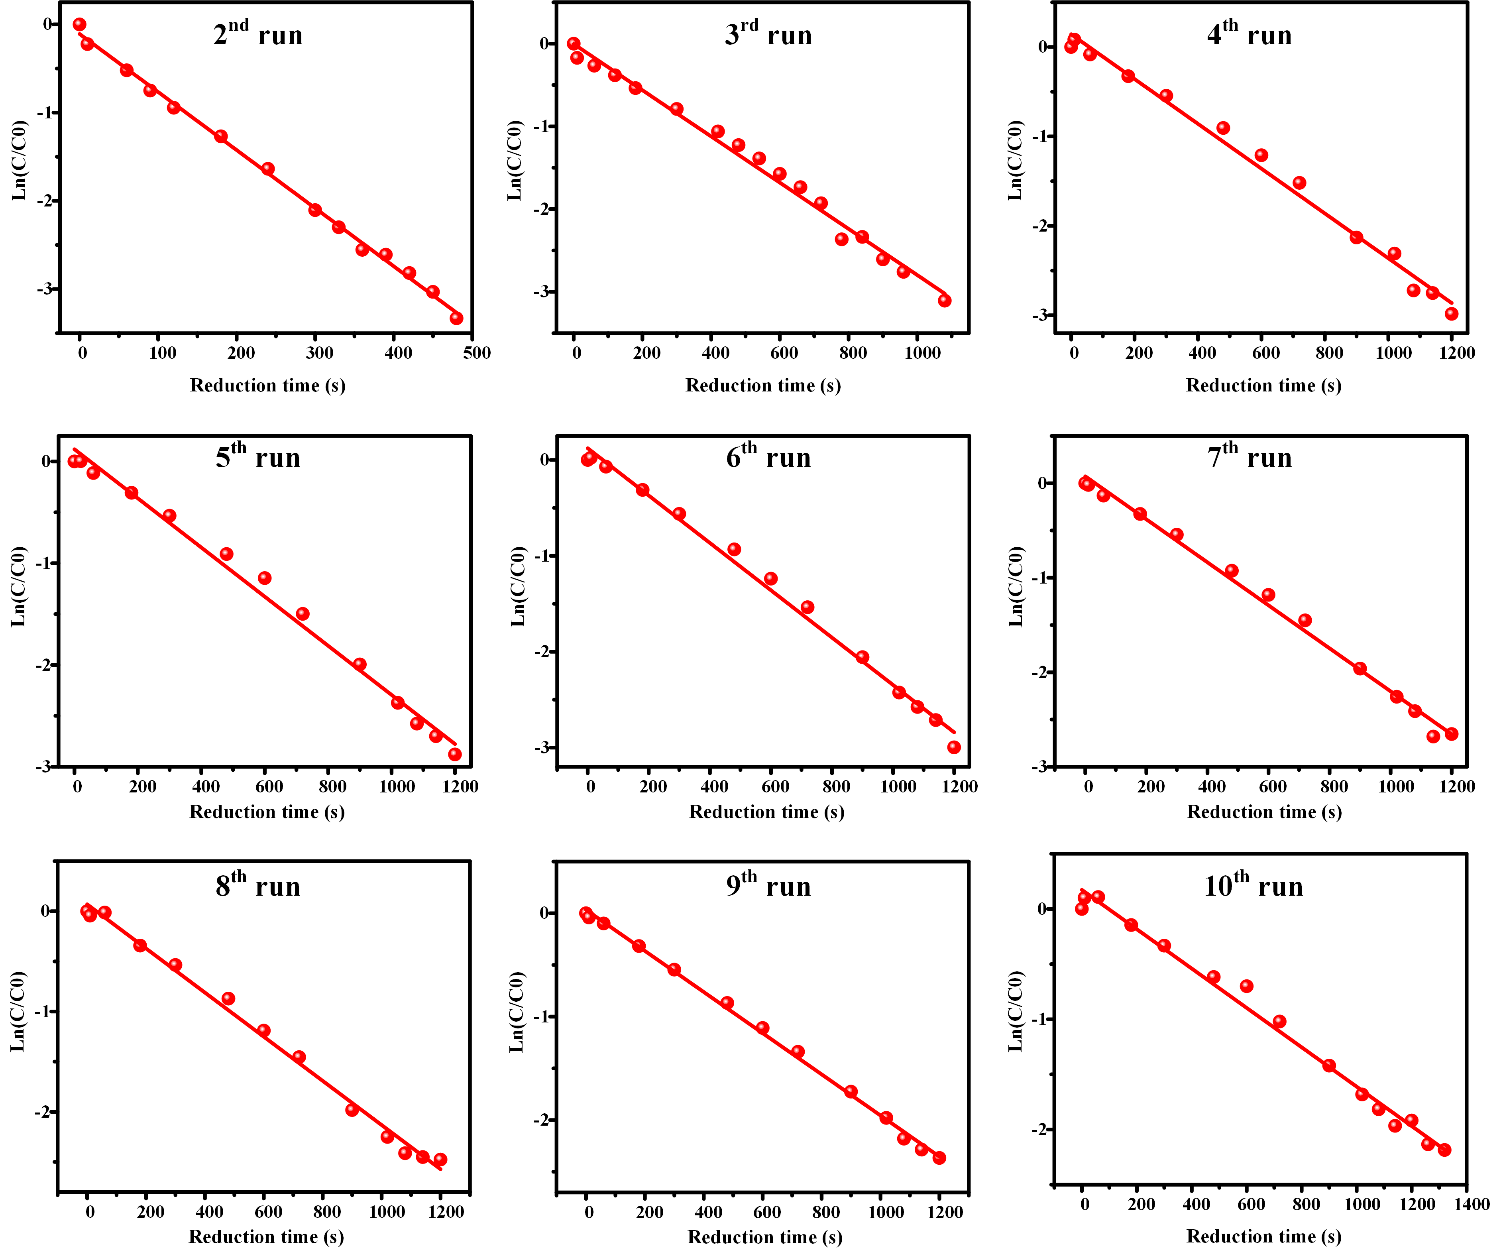


Fig. 9S. The plots of ln(C/C0) as a function of reaction time in recycling activity of (FeNiCoCu)Sb2Ox


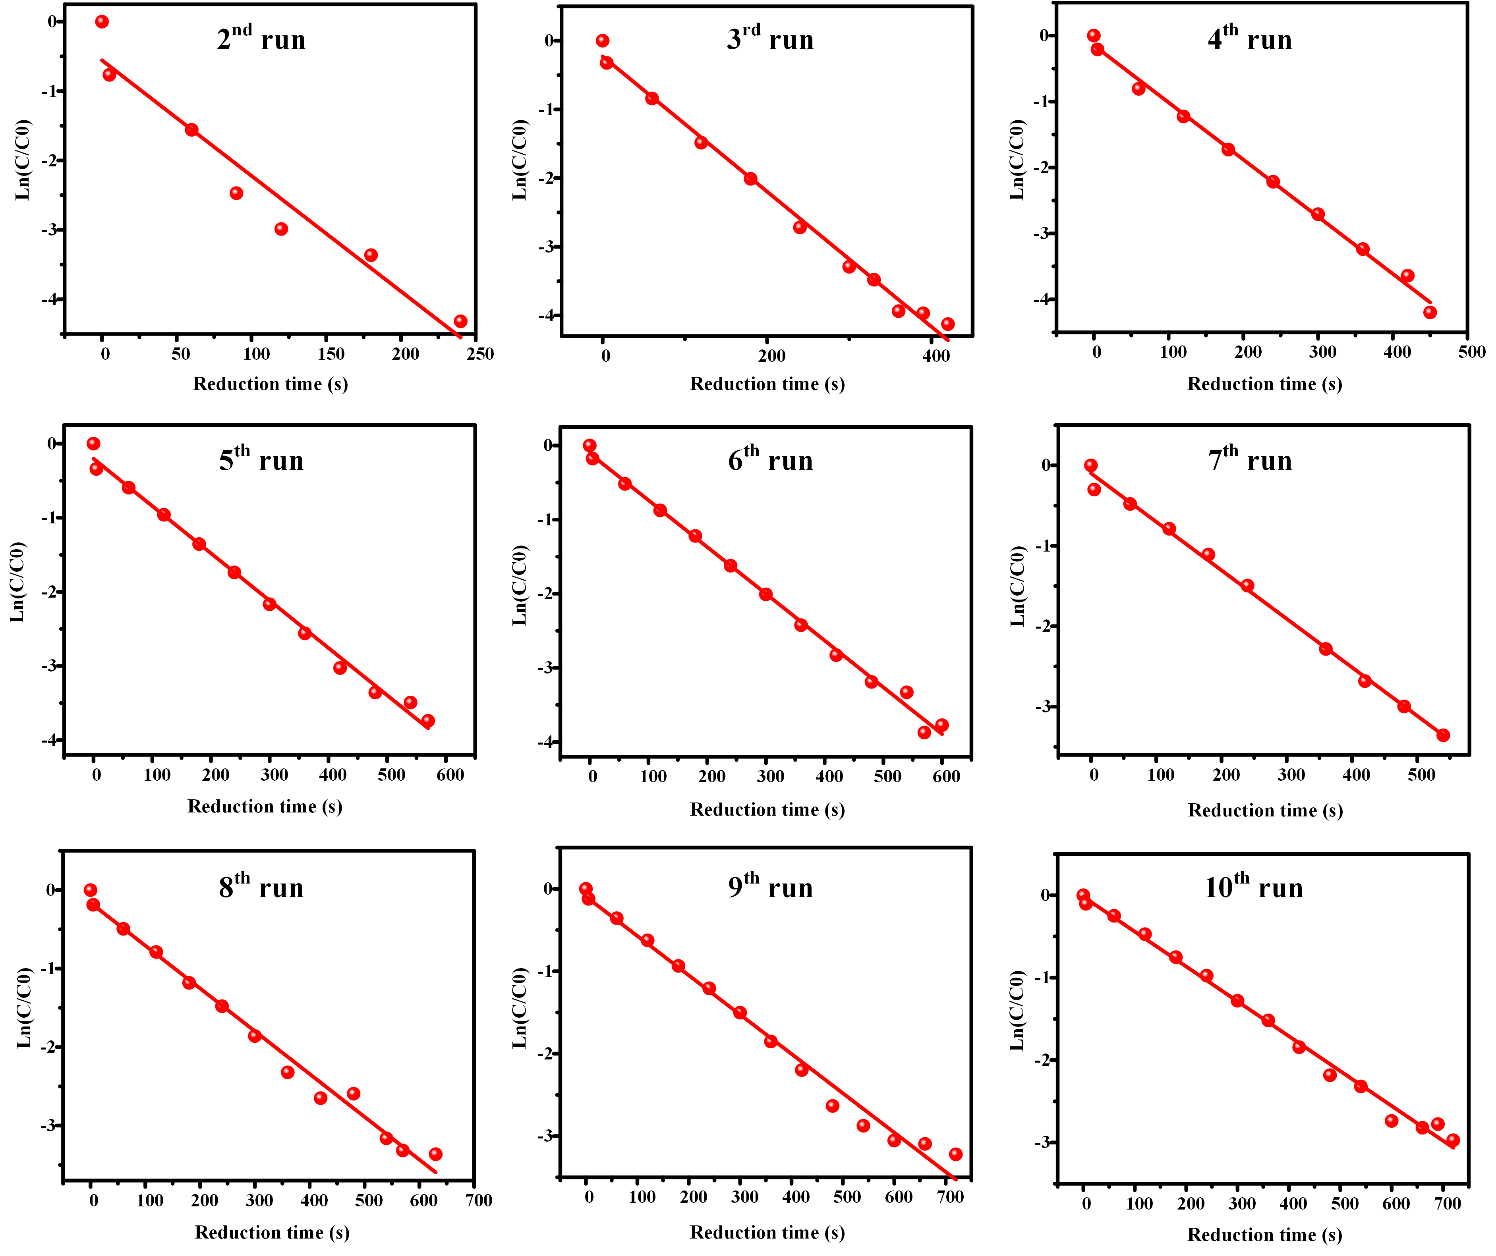


Fig. 10S. The plots of ln(C/C0) as a function of reaction time in recycling activity of (FeNiCoCuZn)SbOx


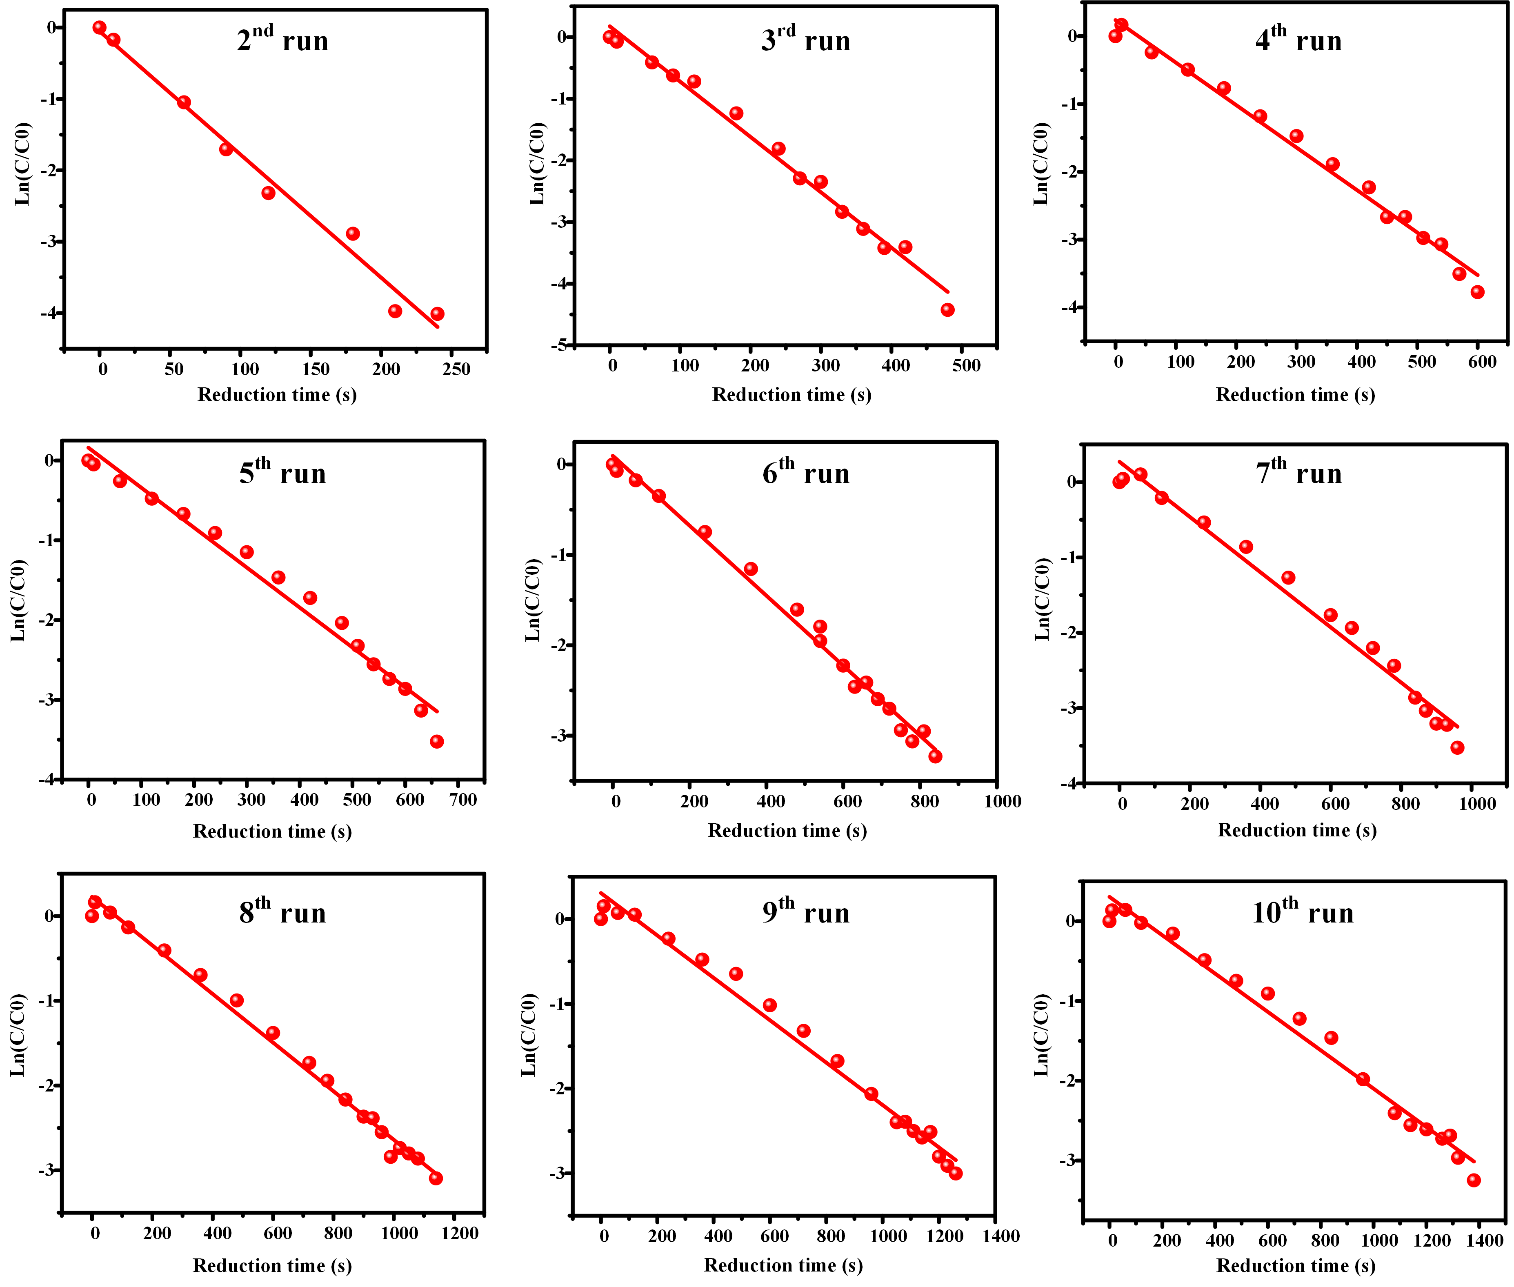


Fig. 11S. The plots of ln(C/C0) as a function of reaction time in recycling activity of (FeNiCoCuZn)Sb2Ox
